# Supplementary material for: Effects of oxygen functionalities on hydrous hydrazine decomposition over carbonaceous materials
Source: Royal Society of Chemistry journal article supplement (doi:10.1039/d3dt02310a), 2023-01-01
Supplement: d3dt02310a1.pdf [file d3dt02310a1.pdf]

## Effect of oxygen functionalities on the hydrous hydrazine decomposition over carbonaceous materials

Silvio Bellomi<sup>a</sup>, Ilaria Barlocco<sup>a</sup>, Simone Tumiatì<sup>b</sup>, Patrizia Fumagalli<sup>b</sup>, Nikolaos Dimitratos<sup>c,d</sup>, Alberto Roldan<sup>e\*</sup>, Alberto Villa<sup>a\*</sup>

<sup>a</sup> Dipartimento di Chimica, Università degli Studi di Milano, via Golgi 19, I-20133, Milano, Italy.

<sup>b</sup> Dipartimento di Scienze della Terra Ardito Desio, Università degli Studi di Milano, via Mangiagalli 34, Milano I-20133, Italy

<sup>c</sup> Dipartimento di Chimica Industriale "Toso Montanari", Alma Mater Studiorum Università di Bologna, Viale Risorgimento 4, Bologna 40126, Italy

<sup>d</sup> Center for Chemical Catalysis-C3, Alma Mater Studiorum Università di Bologna, Viale Risorgimento 4, Bologna 40136, Italy

<sup>e</sup> Cardiff Catalysis Institute, School of Chemistry, Cardiff University, Main Building, Park Place, CF10 3AT, Cardiff, United Kingdom.

\* alberto.villa@unimi.it

\* RoldanMartinezA@cardiff.ac.uk

### Supporting Information

#### HR C1s model

For the C1s region, seven main peaks were considered<sup>1</sup>: the most intense peak at binding energy (BE) of 284.5 eV is assigned to C in sp<sup>2</sup> bonding configuration, appeared in combination with a satellite at BE of 291.0 eV, relative to the  $\pi$ - $\pi^*$  shaking signals. Peaks at BE of about 286.3-286.4, 287.8-287.9 and 288.8-288.9 eV are assigned to C-O, C=O and O=C-O moieties respectively. A signal related to the presence of CO<sub>3</sub> groups at BE of 289.6 is also identified.

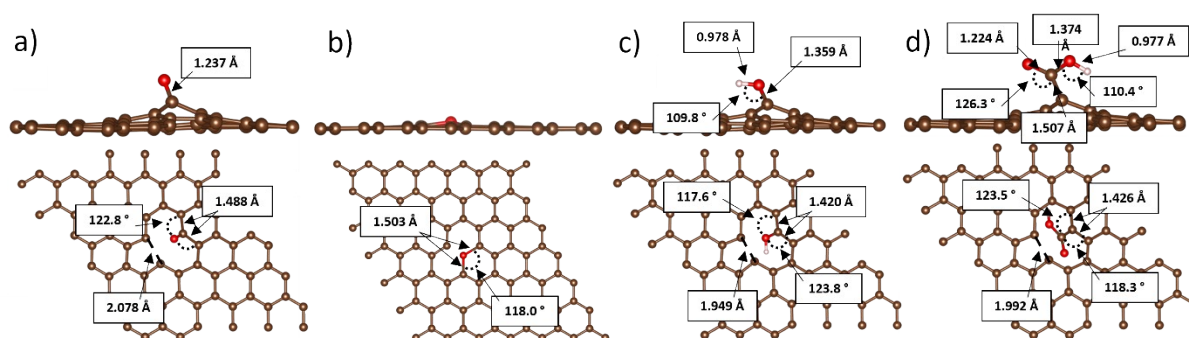

Figure S1 : Top and side view of the optimized functionalized graphitic surfaces: a) C=O, b) C-O-C, c) C-OH and d) COOH. Carbon atom is labelled brown, oxygen in red and hydrogen in white. Insets are bond distances and angles.

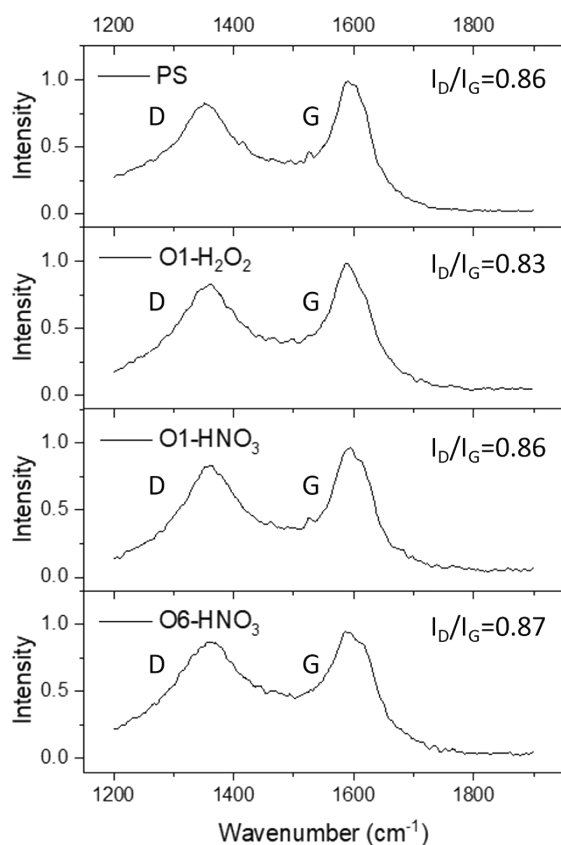

Figure S2 Raman spectra comparison of the fresh catalysts. The D band ( $\approx 1350 \text{ cm}^{-1}$ ), symmetry-forbidden, is enhanced by the presence of intrinsic defects ( $\text{sp}^3$ ), whereas the G band ( $\approx 1580 \text{ cm}^{-1}$ ), symmetry-allowed, is representative of an ideal graphitic behaviour ( $\text{sp}^2$ ).<sup>2</sup> Inset are bands labels and the  $I_D/I_G$  ratio, a widely employed descriptor for the defectivity quantification of carbonaceous materials.

Table S1 Trends of conversion at 150' and  $\text{H}_2$  selectivity, oxygen content (O/C ratio) as obtained from the XPS survey analysis and graphitization degree quantification ( $I_D/I_G$ ) from Raman.

| Sample                     | Conversion 150' / % | $\text{H}_2$ selectivity / % | O/C ratio | $I_D/I_G$ |
|----------------------------|---------------------|------------------------------|-----------|-----------|
| CNFs                       | 45                  | 89                           | 0.122     | 0.86      |
| O1- $\text{H}_2\text{O}_2$ | 52                  | 35                           | 0.141     | 0.83      |
| O1- $\text{HNO}_3$         | 65                  | 14                           | 0.157     | 0.86      |
| O6- $\text{HNO}_3$         | 89                  | 8                            | 0.181     | 0.87      |

Table S2 Summary of the XPS high resolution analysis of the O1s spectral region of the fresh materials

| <b>Sample</b>                        | <b>C-O-C /<br/>BE.<br/>(At%)</b> | <b>C-OH /<br/>B.E.<br/>(At%)</b> | <b>C=O /<br/>BE.<br/>(At%)</b> | <b>COOH /<br/>B.E.<br/>(At%)</b> | <b>H<sub>2</sub>O /<br/>BE.<br/>(At%)</b> |
|--------------------------------------|----------------------------------|----------------------------------|--------------------------------|----------------------------------|-------------------------------------------|
| <b>CNFs</b>                          | 532.9<br>(19.5)                  | 533.4<br>(14.3)                  | 531.4<br>(26.7)                | 532.3<br>(32.3)                  | 535.0<br>(7.3)                            |
| <b>O1-H<sub>2</sub>O<sub>2</sub></b> | 533.2<br>(23.1)                  | 533.1<br>(18.2)                  | 531.1<br>(24.5)                | 532.1<br>(29.3)                  | 535.1<br>(7.9)                            |
| <b>O1-HNO<sub>3</sub></b>            | 532.9<br>(14.8)                  | 533.8<br>(11.6)                  | 531.5<br>(28.6)                | 532.8<br>(37.9)                  | 535.0<br>(7.2)                            |
| <b>O6-HNO<sub>3</sub></b>            | 533.1<br>(7.4)                   | 534.0<br>(4.4)                   | 531.3<br>(37.7)                | 532.8<br>(44.4)                  | 535.0<br>(6.2)                            |

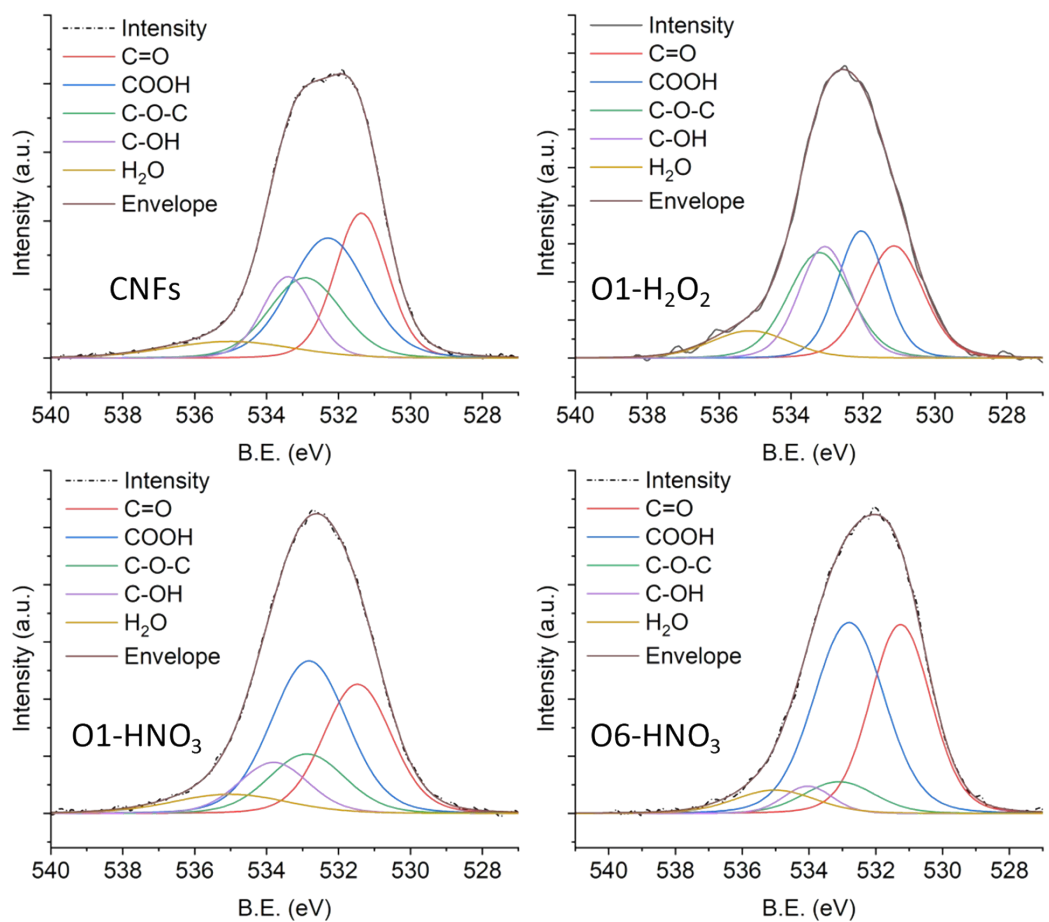

Figure S3 HR analysis of the O1s region for the fresh catalysts.

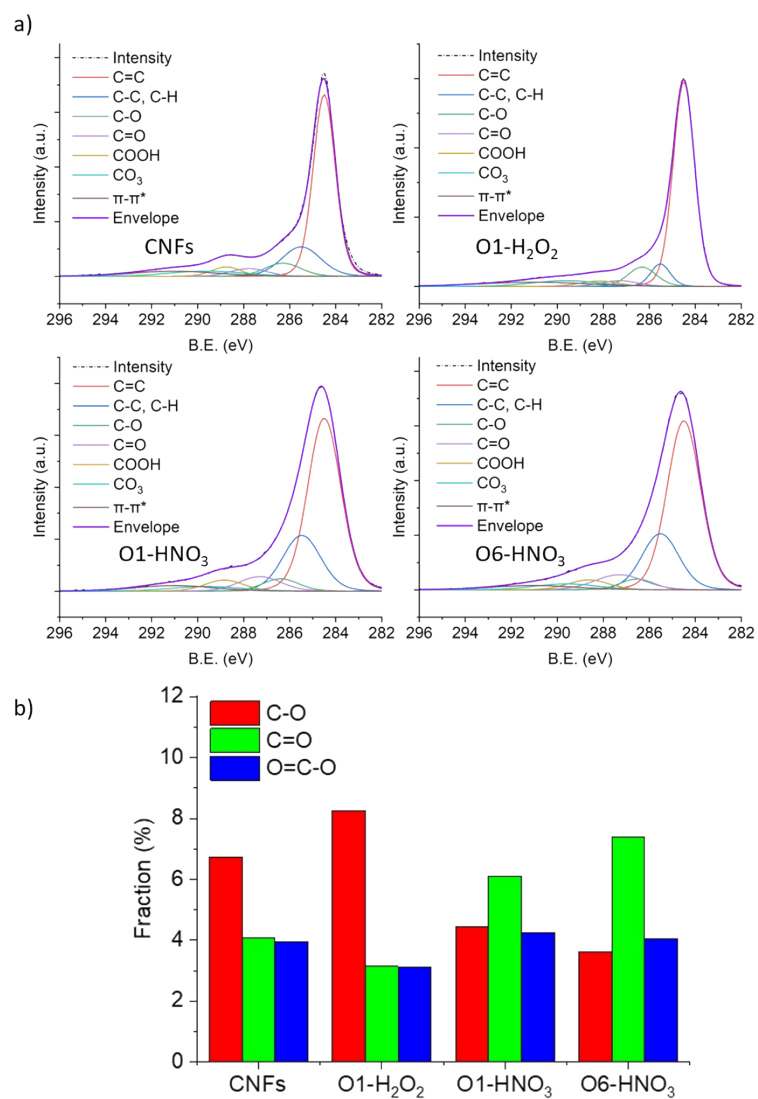

Figure S4 HR analysis of the C1s region: a) fitting and b) speciation of the oxygen-containing functional groups for the different catalyst.

Table S3 Summary of the XPS high resolution analysis of the C1s core level for the fresh materials.

| Sample                           | C=C /<br>BE.<br>(At. %) | C-C,C-H /<br>B.E.<br>(At. %) | C-O /<br>B.E.<br>(At. %) | C=O /<br>BE.<br>(At. %) | O=C-O /<br>BE.<br>(At. %) | $\pi$ - $\pi^*$ /<br>BE.<br>(At. %) | CO <sub>3</sub> /<br>BE.<br>(At. %) |
|----------------------------------|-------------------------|------------------------------|--------------------------|-------------------------|---------------------------|-------------------------------------|-------------------------------------|
| CNFs                             | 284.5<br>(56.7)         | 285.5<br>(16.3)              | 286.3<br>(6.7)           | 287.8<br>(4.1)          | 288.8<br>(4.0)            | 291.0<br>(6.5)                      | 289.6<br>(5.8)                      |
| O1-H <sub>2</sub> O <sub>2</sub> | 284.5<br>(66.1)         | 285.5<br>(6.6)               | 286.3<br>(8.3)           | 287.3<br>(3.1)          | 288.2<br>(3.1)            | 291.0<br>(7.1)                      | 289.6<br>(5.8)                      |
| O1-HNO <sub>3</sub>              | 284.5<br>(56.5)         | 285.5<br>(20.9)              | 286.4<br>(4.4)           | 287.3<br>(6.1)          | 288.8<br>(4.3)            | 291.0<br>(4.4)                      | 289.6<br>(3.4)                      |
| O6-HNO <sub>3</sub>              | 284.5<br>(55.8)         | 285.5<br>(21.0)              | 286.5<br>(3.6)           | 287.3<br>(7.4)          | 288.6<br>(4.1)            | 291.0<br>(3.8)                      | 289.6<br>(3.8)                      |

Table S4 Summary of the XPS high resolution analysis of the O1s spectral region of the spent materials.

| Sample                                    | C-O-C /<br>BE.<br>(At%) | C-OH /<br>B.E.<br>(At%) | C=O /<br>BE.<br>(At%) | COOH /<br>B.E.<br>(At%) | H <sub>2</sub> O /<br>BE.<br>(At%) |
|-------------------------------------------|-------------------------|-------------------------|-----------------------|-------------------------|------------------------------------|
| CNFs                                      | 532.1<br>(3.2)          | 533.6<br>(21.7)         | 531.6<br>(29.5)       | 532.6<br>(38.6)         | 535.2<br>(7.0)                     |
| O1-H <sub>2</sub> O <sub>2</sub><br>spent | 533.2<br>(15.4)         | 534.0<br>(24.1)         | 531.5<br>(25.6)       | 532.5<br>(24.7)         | 535.0<br>(10.3)                    |
| O1-HNO <sub>3</sub><br>spent              | 532.4<br>(4.3)          | 533.7<br>(12.2)         | 531.1<br>(35.9)       | 532.2<br>(36.5)         | 535.0<br>(11.1)                    |
| O6-HNO <sub>3</sub><br>spent              | 533.1<br>(3.1)          | 534.1<br>(6.9)          | 531.3<br>(39.2)       | 532.6<br>(43.0)         | 535.3<br>(7.8)                     |

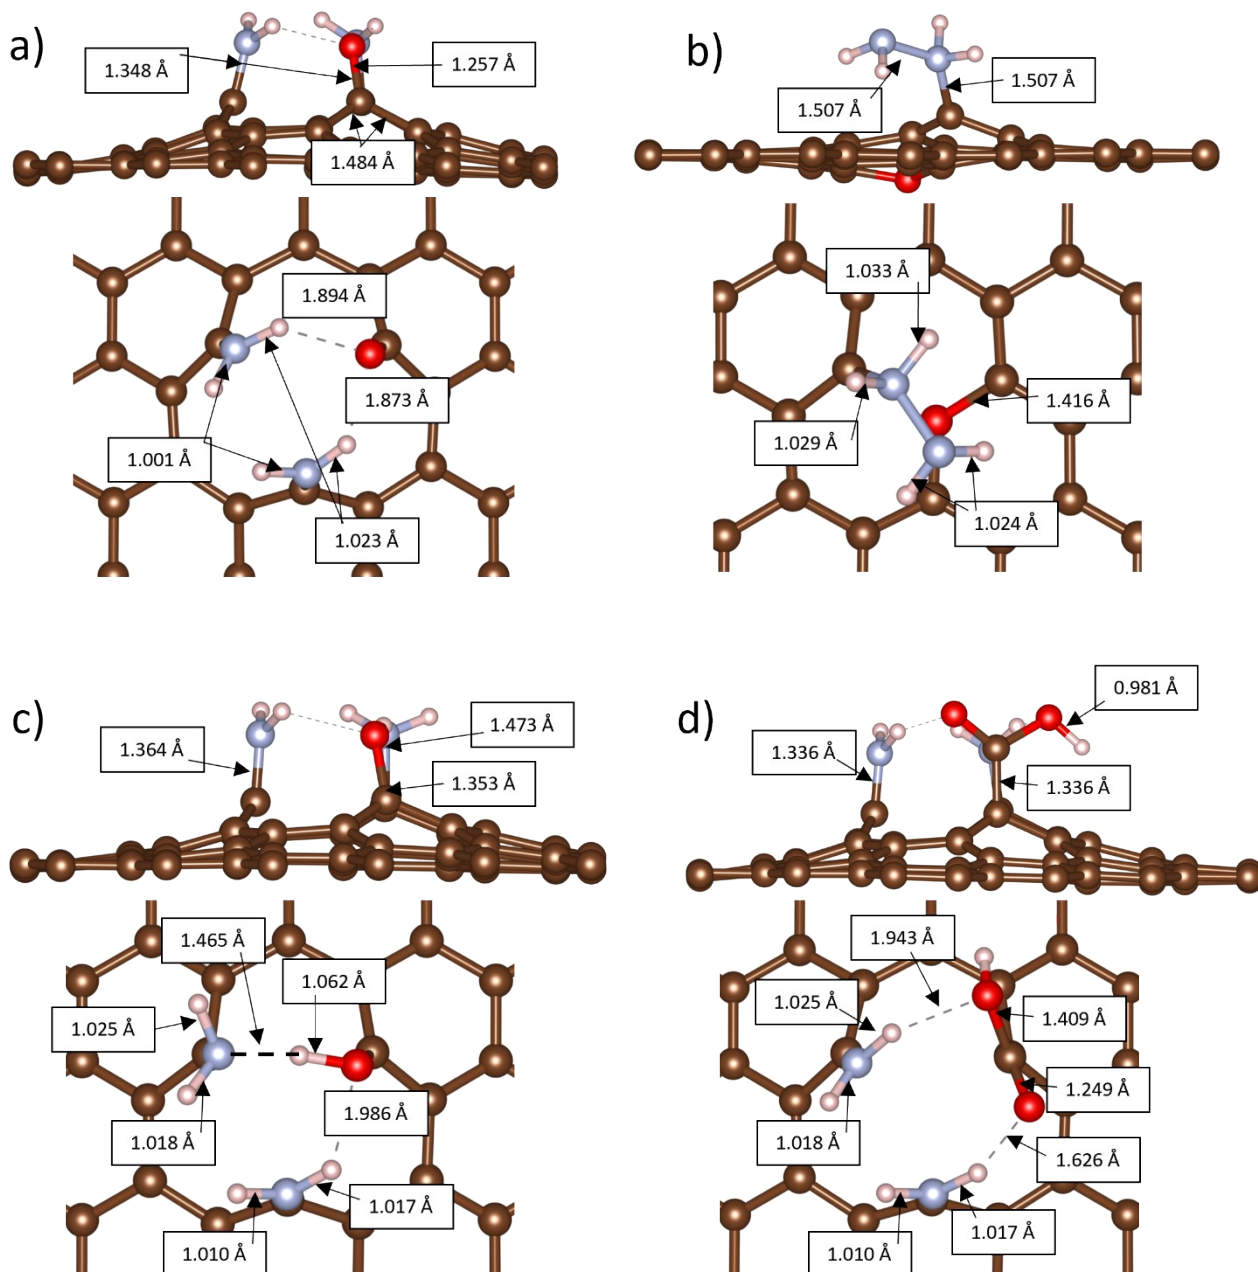

Figure S5. Top and side view of the most favourable adsorption configurations upon interaction with  $N_2H_4$ : a) C=O, b) C-O-C, c) C-OH and d) COOH. The carbon atom is labelled brown, oxygen in red and hydrogen in white. Inset are bond lengths and angles.

Table S5 Adsorption energies ( $E_{ads}$ ), zero-point corrections ( $E_{ZPE}$ ) and entropic thermal contribution (TS, obtained at 323 K) used for the adsorption Gibbs free energies calculations.

| Structure | $E_{ads}$ / eV | $E_{ZPE}$ / eV | TS / eV |
|-----------|----------------|----------------|---------|
| C=O       | -1.32          | 0.35           | -0.42   |
| C-O-C     | -1.56          | 0.36           | -0.42   |

|             |       |      |       |
|-------------|-------|------|-------|
| <b>C-OH</b> | -0.78 | 0.38 | -0.42 |
| <b>COOH</b> | -1.33 | 0.41 | -0.42 |

## References

- 1 R. Arrigo, M. Hävecker, S. Wrabetz, R. Blume, M. Lerch, J. McGregor, E. P. J. Parrott, J. A. Zeitler, L. F. Gladden, A. Knop-Gericke, R. Schlögl and D. S. Su, *J. Am. Chem. Soc.*, 2010, **132**, 9616–9630.
- 2 F. Tuinstra and J. L. Koenig, *J. Chem. Phys.*, 1970, **53**, 1126–1130.
